# Supplementary material for: Combining the In Silico and In Vitro Assays to Identify Strobilanthes cusia Kuntze Bioactives against Penicillin-Resistant Streptococcus pneumoniae
Source: MDPI journal article supplement (doi:10.3390/ph16010105), 2023-01-10
Supplement: s1 [file s1]

## NMR of 23 compounds and their MICs against PRSP:

Tryptanthrin (1) [1], Yellow needles; ESI-MS  $m/z$ : 249  $[M+H]^+$ ;  $^1H$  NMR (400 MHz,  $CDCl_3$ ):  $\delta_H$  8.58 (1H, d,  $J = 8.1$  Hz, H-10), 8.39 (1H, dd,  $J = 7.9, 1.1$  Hz, H-1), 7.99 (1H, d,  $J = 8.1$  Hz, H-4), 7.88 (1H, dd,  $J = 7.6, 0.7$  Hz, H-7), 7.82 (1H, t,  $J = 7.8$  Hz, H-3), 7.75 (1H, t,  $J = 7.8$  Hz, H-9), 7.64 (1H, t,  $J = 7.6$  Hz, H-2), 7.40 (1H, t,  $J = 7.6$  Hz, H-8);  $^{13}C$  NMR (100 MHz,  $CDCl_3$ ):  $\delta_C$  182.8 (C-6), 158.3 (C-12), 146.8 (C-4a), 146.5 (C-10a), 144.5 (C-5a), 138.5 (C-9), 135.3 (C-3), 130.9 (C-4), 130.4 (C-2), 127.7 (C-1), 127.4 (C-8), 125.6 (C-7), 123.9 (C-12a), 122.1 (C-6a), 118.2 (C-10).

2(3H)-benzoxazolinone (2) [2], White powders; ESI-MS  $m/z$ : 158  $[M+Na]^+$ , 134  $[M-H]^-$ ;  $^1H$  NMR (400 MHz,  $CD_3OD$ ):  $\delta_H$  7.07 (4H, m, H-4~7);  $^{13}C$  NMR (100 MHz,  $CD_3OD$ ):  $\delta_C$  156.4 (C-2), 143.9 (C-7a), 129.5 (C-3a), 124.2 (C-7), 122.7 (C-4), 110.3 (C-5), 110.1 (C-6).

(3*R*, 6*R*, 7*E*)-3-hydroxy-4, 7-megastigmadien-9-one (3) [3], Colorless oil; ESI-MS  $m/z$ : 209  $[M+H]^+$ ;  $^1H$  NMR (400 MHz,  $CDCl_3$ ):  $\delta_H$  6.54 (1H, dd,  $J = 15.8, 10.1$  Hz, H-7), 6.10 (1H, d,  $J = 15.8$  Hz, H-8), 5.63 (1H, s, H-4), 4.27 (1H, br s, H-3), 2.50 (1H, d,  $J = 10.1$  Hz, H-6), 2.26 (3H, s, 10-CH<sub>3</sub>), 1.84 (1H, dd,  $J = 13.5, 5.9$  Hz, H-2 $\beta$ ), 1.62 (3H, s, 13-CH<sub>3</sub>), 1.41 (1H, dd,  $J = 13.5, 6.3$  Hz, H-2 $\alpha$ ), 1.03 (3H, s, 11-CH<sub>3</sub>), 0.89 (3H, s, 12-CH<sub>3</sub>);  $^{13}C$  NMR (100 MHz,  $CDCl_3$ ):  $\delta_C$  198.3 (C-9), 147.4 (C-7), 135.6 (C-5), 133.8 (C-8), 126.0 (C-4), 65.7 (C-3), 54.5 (C-6), 44.0 (C-2), 34.1 (C-1), 29.5 (C-11), 27.4 (C-10), 24.9 (C-12).

1, 3-dihydro-2*H*-indol-2-one (4) [4], White powder; ESI-MS  $m/z$ : 134  $[M+H]^+$ ;  $^1H$  NMR (400 MHz,  $CDCl_3$ ):  $\delta_H$  7.20 (2H, t,  $J = 7.7$  Hz, H-4, 7), 7.00 (1H, t,  $J = 7.5$  Hz, H-6), 6.86 (1H, d,  $J = 7.7$  Hz, H-5), 3.52 (2H, s, H-3);  $^{13}C$  NMR (100 MHz,  $CDCl_3$ ):  $\delta_C$  177.6 (C-2), 142.5 (C-7a), 128.1 (C-4), 125.5 (C-3a), 124.9 (C-5), 122.6 (C-6), 109.9 (C-7), 36.4 (C-3).

1*H*-pyrrole-2, 5-dicarboxylic acid (5) [5], Yellow solid; ESI-MS  $m/z$ : 178  $[M+Na]^+$ ;  $^1H$  NMR (400 MHz,  $CDCl_3$ ):  $\delta_H$  6.89 (2H, d,  $J = 2.6$  Hz, H-3, 4);  $^{13}C$  NMR (100 MHz,  $CDCl_3$ ):  $\delta_C$  161.7 (2-COOH), 126.4 (C-2, 5), 115.9 (C-3, 4).

bis(2-ethylhexyl) benzene-1, 2-dicarboxylate (6) [6], Yellow oil; ESI-MS  $m/z$ : 391  $[M+H]^+$ ;  $^1H$  NMR (400 MHz,  $CDCl_3$ ):  $\delta_H$  7.69 (2H, dd,  $J = 5.7, 3.3$  Hz, H-3'', 6''), 7.51 (2H, dd,  $J = 5.7, 3.3$  Hz, H-4'', 5''), 4.20 (4H, d,  $J = 5.9$  Hz, 2 x O-CH<sub>2</sub>), 1.65 (2H, m, H-2, 2'), 1.30 (16H, m, 8 x CH<sub>2</sub>), 0.90 (6H, t,  $J = 7.5$  Hz, H-8, 8'), 0.87 (6H, t,  $J = 7.0$  Hz, H-6, 6');  $^{13}C$  NMR (100 MHz,  $CDCl_3$ ):  $\delta_C$  168.0 (C=O), 132.7 (C-1'', 2''), 131.1 (C-4'', 5''), 129.0 (C-3'', 6''), 68.4 (C-1, 1'), 38.9 (C-2, 2'), 30.6 (C-3, 3'), 29.1 (C-4, 4'), 24.0 (C-7, 7'), 23.2 (C-5, 5'), 14.3 (C-8, 8'), 11.2 (C-6, 6').

phthalic acid isodibutyl ester (7) [7], Yellow oil; ESI-MS  $m/z$ : 279  $[M+H]^+$ ;  $^1H$  NMR (400 MHz,  $CDCl_3$ ):  $\delta_H$  7.70 (2H, m, H-3, 6), 7.51 (2H, m, H-4, 5), 4.06 (4H, d,  $J = 6.7$  Hz, H-2', 2''), 2.02 (2H, m, H-3', 3''), 0.96 (12H, d,  $J = 6.7$  Hz, H-4', 5', 4'', 5'');  $^{13}C$  NMR (100 MHz,  $CDCl_3$ ):  $\delta_C$  167.9 (C-1', 1''), 132.6 (C-1, 2), 131.1 (C-3, 6), 129.0 (C-4, 5), 72.0 (C-2', 2''), 27.9 (C-3', 2''), 19.4 (C-4', 5', 4'', 5'').

cephalandole B (8) [8], Yellow powder; ESI-MS  $m/z$ : 295  $[M+H]^+$ , 317  $[M+Na]^+$ ;  $^1H$  NMR (400 MHz,  $CDCl_3$ ):  $\delta_H$  11.72 (1H, br s, 1'-NH), 8.92 (1H, d,  $J = 8.0$  Hz, H-6'), 8.55 (1H, br s, H-1), 8.40 (1H, d,  $J = 7.5$  Hz, H-4), 8.06 (1H, d,  $J = 8.0$  Hz, H-3'), 7.95 (1H, d,  $J = 2.6$  Hz, H-2), 7.58 (1H, t,  $J = 7.9$  Hz, H-5'), 7.43 (1H, d,  $J = 7.3$  Hz, H-7), 7.29 (2H, m, H-5, 6), 7.07 (1H, t,  $J = 7.4$  Hz, H-4'), 3.94 (3H, s, 7'-OCH<sub>3</sub>);  $^{13}C$  NMR (100 MHz,  $CDCl_3$ ):  $\delta_C$  169.4 (C-7'), 163.8 (C-10), 142.7 (C-1'), 136.5 (C-8), 135.0 (C-5'), 131.1 (C-3'), 127.5 (C-2), 125.9 (C-9), 123.6 (C-6), 122.2 (C-5), 122.0 (C-4'), 121.8 (C-4), 120.7 (C-6'), 114.8 (C-2'), 113.7 (C-3), 111.6 (C-7), 52.6 (7'-OCH<sub>3</sub>).

(-)-3-hydroxy- $\beta$ -ionone (9) [9], Yellow oil; ESI-MS  $m/z$ : 209  $[M+H]^+$ ;  $^1H$  NMR (500 MHz,  $CD_3OD$ ):  $\delta_H$  7.34 (1H, d,  $J = 16.5$  Hz, H-7), 6.15 (1H, d,  $J = 16.5$  Hz, H-8), 3.93 (1H, m, H-3), 2.31 (3H, s, H-10), 1.80 (3H, s, H-13), 1.15 (3H, s, H-12), 1.12 (3H, s, H-11);  $^{13}C$  NMR (125 MHz,  $CD_3OD$ ):  $\delta_C$  201.4 (C-9), 144.6 (C-7), 137.0 (C-6), 134.4 (C-8), 133.4 (C-5), 65.0 (C-3), 48.8 (C-2), 43.6 (C-4), 37.9 (C-1), 30.7 (C-11), 29.0 (C-12), 27.4 (C-10), 21.9 (C-13).

4-hydroxy-5-methoxy-benzoic acid (10) [10], White powder; ESI-MS:  $m/z$  167  $[M-H]^+$ ;  $^1H$  NMR (400 MHz,  $CD_3OD$ ):  $\delta_H$  7.55 (2H, m, H-2, 6), 6.83 (1H, d,  $J = 8.7$  Hz, H-3), 4.90 (3H, s, 5-OCH<sub>3</sub>);  $^{13}C$  NMR (100 MHz,  $CD_3OD$ ):  $\delta_C$  170.3 (1-COOH), 152.8 (C-4), 148.8 (C-5), 125.4 (C-2), 123.3 (C-1), 116.0 (C-3), 113.9 (C-6), 56.5 (5-OCH<sub>3</sub>).

3 $\beta$ -hydroxy-5 $\alpha$ , 6 $\alpha$ -epoxy-7-megastigmen-9-one (11) [11], Colorless oil; ESI-MS  $m/z$ : 225  $[M+H]^+$ ;  $^1H$  NMR (400 MHz,  $CDCl_3$ ):  $\delta_H$  7.00 (1H, d,  $J = 15.6$  Hz, H-7), 6.25 (1H, d,  $J = 15.6$  Hz, H-8), 3.87 (1H, m, H-3), 2.35 (1H, dd,  $J = 14.5, 5.0$  Hz, H-4 $\beta$ ), 2.25 (3H, s, H-10), 1.63 (1H, m, H-4 $\alpha$ ), 1.59 (1H, m, H-2 $\alpha$ ), 1.23 (1H, m, H-2 $\beta$ ), 1.16 (6H, s, H-12, 13), 0.94 (3H, s, H-11);  $^{13}C$  NMR (100 MHz,  $CDCl_3$ ):  $\delta_C$  197.7 (C-9), 142.7 (C-7), 132.8 (C-8), 69.7 (C-6), 67.5 (C-5), 64.1 (C-3), 46.8 (C-2), 40.7 (C-4), 35.3 (C-1), 29.5 (C-12), 28.5 (C-10), 25.1 (C-11), 20.0 (C-13).

calendin (12) [12], White powder; ESI-MS  $m/z$ : 197  $[M+H]^+$ ;  $^1H$  NMR (400 MHz,  $CDCl_3$ ):  $\delta_H$  5.65 (1H, s, H-3), 4.29 (1H, dt,  $J = 9.6, 6.4, 3.2$  Hz, H-6), 2.44 (1H, dt,  $J = 13.7, 5.1, 2.6$  Hz, H-7a), 2.20 (1H, d,  $J = 2.7$  Hz, 6-OH), 1.96 (1H, dt,  $J = 13.7, 5.1, 2.6$  Hz, H-5a), 1.75 (3H, s, 7a-CH<sub>3</sub>), 1.71 (1H, d,  $J = 3.9$  Hz, H-7b), 1.48 (1H, dd,  $J = 14.6, 3.7$  Hz, H-5b), 1.43 (3H, s, 4-CH<sub>3</sub>), 1.23 (3H, s, 4-CH<sub>3</sub>);  $^{13}C$  NMR (100 MHz,  $CDCl_3$ ):  $\delta_C$  183.1 (C-3a), 172.4 (C-2), 112.9 (C-3), 87.2 (C-7a), 66.8 (C-6), 47.4 (C-5), 45.7 (C-7), 36.2 (C-4), 30.8 (C-8, 4-CH<sub>3</sub>), 27.1 (C-10, 7a-CH<sub>3</sub>), 26.6 (C-9, 4-CH<sub>3</sub>).

3-(2'-hydroxyphenyl)-4(3H)-quinazolinone (13) [13], White powder; ESI-MS  $m/z$ : 239  $[M+H]^+$ ;  $^1H$  NMR (500 MHz,  $CD_3OD$ ):  $\delta_H$  8.17 (1H, d,  $J = 7.9$  Hz, H-5), 8.05 (1H, s, H-2), 7.76 (1H, t,  $J = 7.1$  Hz, H-7), 7.64 (1H, d,  $J = 8.1$  Hz, H-8), 7.48 (1H, t,  $J = 7.5$  Hz, H-6), 7.24 (2H, m, H-4', 6'), 6.96 (1H, d,  $J = 8.1$  Hz, H-3'), 6.90 (1H, t,  $J = 7.3$  Hz, H-5');  $^{13}C$  NMR (125 MHz,  $CD_3OD$ ):  $\delta_C$  161.7 (C-4), 153.6 (C-2'), 148.7 (C-2), 148.3 (C-8a), 135.2 (C-7), 131.2 (C-4'), 129.4 (C-6'), 128.0 (C-6), 127.3 (C-8), 127.0 (C-5), 125.2 (C-1'), 122.7 (C-4a), 120.2 (C-5'), 117.1 (C-3').

1H-indole-3-carbaldehyde (14) [14], White powder; ESI-MS  $m/z$ : 146  $[M+H]^+$ ;  $^1H$  NMR (400 MHz,  $CD_3OD$ ):  $\delta_H$  9.85 (1H, s, CHO), 8.14 (1H, dd,  $J = 7.0, 2.0$  Hz, H-4), 8.05 (1H, s, H-2), 7.45 (1H, d,  $J = 7.4$  Hz, H-7), 7.23 (2H, m, H-5, 6);  $^{13}C$  NMR (100 MHz,  $CD_3OD$ ):  $\delta_C$  187.6 (C-8), 139.8 (C-2), 139.0 (C-7a), 125.8 (C-3a), 125.1 (C-4), 123.7 (C-6), 122.5 (C-5), 120.2 (C-3), 113.2 (C-7).

hispidulin (15) [15], Yellow powder; ESI-MS  $m/z$ : 301  $[M+H]^+$ ;  $^1H$  NMR (400 MHz,  $CD_3OD$ ):  $\delta_H$  7.83 (2H, d,  $J = 7.3$  Hz, H-2', 6'), 6.91 (2H, d,  $J = 7.3$  Hz, H-3', 5'), 6.57 (1H, s, H-8), 6.54 (1H, s, H-3), 3.87 (3H, s, 6-OCH<sub>3</sub>);  $^{13}C$  NMR (100 MHz,  $CD_3OD$ ):  $\delta_C$  184.4 (C-4), 166.5 (C-2), 162.9 (C-4'), 158.9 (C-7), 154.8 (C-5), 154.2 (C-9), 133.0 (C-6), 129.6 (C-2', 6'), 123.4 (C-1'), 117.2 (C-3', 5'), 105.9 (C-10), 103.5 (C-3), 95.4 (C-8), 61.1 (6-OCH<sub>3</sub>).

2-hydroxy-(2H)-1, 4-benzoxazin-3(4H)-one (16) [16], Faint yellow amorphous; ESI-MS  $m/z$ : 166  $[M+H]^+$ ;  $^1H$  NMR (400 MHz,  $CD_3OD$ ):  $\delta_H$  6.99 (3H, m, H-6, 7, 8), 6.93 (1H, m, H-5), 5.53 (1H, s, H-2);  $^{13}C$  NMR (100 MHz,  $CD_3OD$ ):  $\delta_C$  165.4 (C-3), 142.5 (C-9), 127.6 (C-10), 125.0 (C-6), 123.9 (C-7), 118.9 (C-8), 117.0 (C-5), 92.2 (C-2).

2-hydroxy-N-(2-hydroxyphenyl)propionamide (17) [17], White powder; ESI-MS  $m/z$ : 182  $[M+H]^+$ , 204  $[M+Na]^+$ ;  $^1H$  NMR (400 MHz,  $CD_3COCD_3$ ):  $\delta_H$  8.08 (1H, d,  $J = 7.8$  Hz, H-6'), 6.93 (2H, m, H-3', 4'), 6.82 (1H, m, H-5'), 4.31 (1H, q,  $J = 6.8$  Hz, H-2), 1.43 (3H, d,  $J = 6.8$  Hz, H-3),  $^{13}C$  NMR (100 MHz,  $CD_3COCD_3$ ):  $\delta_C$  174.1 (C-1), 147.7 (C-2'), 127.5 (C-1'), 125.2 (C-5'), 121.1 (C-4'), 120.6 (C-6'), 116.7 (C-3'), 69.2 (C-2), 21.3 (C-3).

bungein A (18) [18], White powder; ESI-MS  $m/z$ : 273  $[M-H]^-$ ;  $^1H$  NMR (400 MHz,  $CDCl_3$ ):  $\delta_H$  7.01 (4H, dd,  $J = 8.4, 2.9$  Hz, H-3, 5, 3', 5'), 6.69 (4H, dd,  $J = 8.4, 2.9$  Hz, H-2, 6, 2', 6'), 3.67 (4H, t,  $J = 7.2$  Hz, H- $\beta$ ,  $\beta'$ ), 2.70 (4H, t,  $J = 7.2$  Hz, H- $\alpha$ ,  $\alpha'$ );  $^{13}C$  NMR (100 MHz,  $CDCl_3$ ):  $\delta_C$  156.9 (C-1,1'), 131.1 (C-4, 4'), 131.0 (C-3, 5, 3', 5'), 116.3 (2, 6, 2', 6'), 64.7 (C- $\beta$ ,  $\beta'$ ), 39.5 ( $\alpha$ ,  $\alpha'$ ).

p-hydroxyacetophenone (19) [19], White powder; ESI-MS  $m/z$ : 137  $[M+H]^+$ ;  $^1H$  NMR (400 MHz,  $CD_3COCD_3$ ):  $\delta_H$  7.88 (2H, d,  $J = 9.0$  Hz, H-2', 6'), 6.91 (2H, d,  $J =$

9.0 Hz, H-3', 5'), 2.48 (3H, s, H-2);  $^{13}\text{C}$  NMR (100 MHz,  $\text{CD}_3\text{COCD}_3$ ):  $\delta_{\text{C}}$  196.3 (C-1), 162.8 (C-4'), 131.6 (C-2', 6'), 130.6 (C-1'), 116.0 (C-3', 5'), 26.4 (C-2).

deoxyvasicinone (20) [20], Yellow oil; ESI-MS  $m/z$ : 187  $[\text{M}+\text{H}]^+$ ;  $^1\text{H}$  NMR (500 MHz,  $\text{CDCl}_3$ ):  $\delta_{\text{H}}$  8.25 (1H, dd,  $J = 7.9, 0.6$  Hz, H-8), 7.69 (1H, m, H-7), 7.61 (1H, d,  $J = 8.1$  Hz, H-6), 7.41 (1H, t,  $J = 7.3$  Hz, H-5), 4.18 (2H, t,  $J = 7.5$  Hz, H-11), 3.15 (2H, t,  $J = 7.9$  Hz, H-9), 2.26 (2H, m, H-10);  $^{13}\text{C}$  NMR (125 MHz,  $\text{CDCl}_3$ ):  $\delta_{\text{C}}$  161.2 (C-4), 159.7 (C-2), 149.3 (C-8a), 134.4 (C-7), 126.9 (C-6), 126.6 (C-8), 126.5 (C-5), 120.7 (C-4a), 46.7 (C-11), 32.7 (C-9), 19.7 (C-10).

Nicotinamide (21) [21], White powder; ESI-MS  $m/z$ : 123  $[\text{M}+\text{H}]^+$ ;  $^1\text{H}$  NMR (500 MHz,  $\text{CD}_3\text{COCD}_3$ ):  $\delta_{\text{H}}$  9.10 (1H, d,  $J = 1.6$  Hz, H-2), 8.70 (1H, d,  $J = 3.7$  Hz, H-6), 8.25 (1H, dt,  $J = 7.9, 1.8$  Hz, H-4), 7.47 (1H, dd,  $J = 7.9, 4.8$  Hz, H-5);  $^{13}\text{C}$  NMR (125 MHz,  $\text{CD}_3\text{COCD}_3$ ):  $\delta_{\text{C}}$  167.5 (C-7), 153.0 (C-2), 149.8 (C-6), 135.9 (C-4), 130.7 (C-3), 124.2 (C-5).

4(3*H*)-quinazolinone (22) [22], White needles; ESI-MS  $m/z$ : 147  $[\text{M}+\text{H}]^+$ ;  $^1\text{H}$  NMR (400 MHz,  $\text{C}_5\text{D}_5\text{N}$ ):  $\delta_{\text{H}}$  8.57 (1H, d,  $J = 7.9$  Hz, H-5), 8.48 (1H, s, H-2), 7.94 (1H, d,  $J = 8.1$  Hz, H-7), 7.74 (1H, t,  $J = 7.6$  Hz, H-8), 7.47 (1H, t,  $J = 7.5$  Hz, H-6);  $^{13}\text{C}$  NMR (100 MHz,  $\text{C}_5\text{D}_5\text{N}$ ):  $\delta_{\text{C}}$  162.5 (C-4), 150.5 (C-8a), 146.3 (C-2), 134.9 (C-7), 128.5 (C-6), 127.4 (C-5), 127.2 (C-8), 124.6 (C-4a).

9(*Z*)-octadecenamide (23) [23], White powder; ESI-MS  $m/z$ : 282  $[\text{M}+\text{H}]^+$ ;  $^1\text{H}$  NMR (400 MHz,  $\text{CD}_3\text{OD}$ ):  $\delta_{\text{H}}$  5.34 (2H, m, H-9, 10), 2.19 (2H, t,  $J = 7.2$  Hz, H-2), 2.03 (4H, m, H-8, 11), 1.60 (2H, t,  $J = 7.0$  Hz, H-3), 1.29 (20H, s, H-4~7, 12~17), 0.90 (3H, t,  $J = 6.8$  Hz, H-18);  $^{13}\text{C}$  NMR (100 MHz,  $\text{CD}_3\text{OD}$ ):  $\delta_{\text{C}}$  179.7 (C-1), 131.0 (C-9, 10), 36.7 (C-2), 33.2 (C-16), 31.0 (C-7), 30.9 (C-12), 30.8 (C-6), 30.8 (C-13), 30.8 (C-14), 30.8 (C-15), 30.6 (C-5), 30.5 (C-4), 28.3 (C-8, 11), 27.1 (C-3), 23.9 (C-17), 14.6 (C-18).

**Table S3.** NMR of 23 isolated compounds and their MICs against PRSP.

| NO. | MIC<br>( $\mu\text{g/ml}$ ) | Weight<br>(mg) | Molecular<br>weight<br>/ molecular<br>formula            | Chemical structure and name                                                                                   |
|-----|-----------------------------|----------------|----------------------------------------------------------|---------------------------------------------------------------------------------------------------------------|
| 1   | 50                          | 10             | 248<br>( $\text{C}_{15}\text{H}_8\text{N}_2\text{O}_2$ ) | 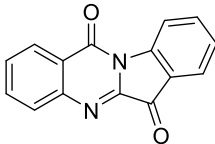<br>tryptanthrin          |
| 2   | >800                        | 182            | 135<br>( $\text{C}_7\text{H}_5\text{NO}_2$ )             | <br>2(3H)-benzoxazolinone |

|    |      |    |                                                                         |                                                                                                                                         |
|----|------|----|-------------------------------------------------------------------------|-----------------------------------------------------------------------------------------------------------------------------------------|
| 3  | 400  | 10 | 208<br>(C <sub>13</sub> H <sub>20</sub> O <sub>2</sub> )                | 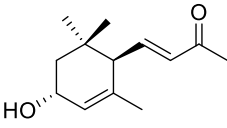 <p>(3R,6R,7E)-3-hydroxy-4,7-megastigmadien-9-one</p> |
| 4  | 400  | 2  | 133<br>(C <sub>8</sub> H <sub>7</sub> NO)                               |  <p>1,3-dihydro-2H-indol-2-one</p>                    |
| 5  | 200  | 2  | 155<br>(C <sub>6</sub> H <sub>5</sub> NO <sub>4</sub> )                 |  <p>1H-pyrrole-2,5-dicarboxylic acid</p>              |
| 6  | >800 | 2  | 390<br>(C <sub>24</sub> H <sub>38</sub> O <sub>4</sub> )                |  <p>bis(2-ethylhexyl) benzene-1,2-dicarboxylate</p>   |
| 7  | >800 | 16 | 278<br>(C <sub>16</sub> H <sub>22</sub> O <sub>4</sub> )                |  <p>phthalic acid isodibutyl ester</p>               |
| 8  | >800 | 1  | 294<br>(C <sub>17</sub> H <sub>14</sub> N <sub>2</sub> O <sub>3</sub> ) |  <p>cephalandole B</p>                              |
| 9  | >800 | 3  | 208<br>(C <sub>13</sub> H <sub>20</sub> O <sub>2</sub> )                |  <p>(-)-3-hydroxy-β-ionone</p>                      |
| 10 | >800 | 12 | 168<br>(C <sub>8</sub> H <sub>8</sub> O <sub>4</sub> )                  |  <p>4-hydroxy-5-methoxy-benzoic acid</p>           |
| 11 | 400  | 8  | 224<br>(C <sub>13</sub> H <sub>20</sub> O <sub>3</sub> )                |  <p>3β-hydroxy-5α,6α-epoxy-7-megastigmen-9-one</p>  |

|    |      |    |                                                                         |                                                                                                                                   |
|----|------|----|-------------------------------------------------------------------------|-----------------------------------------------------------------------------------------------------------------------------------|
| 12 | >800 | 26 | 196<br>(C <sub>11</sub> H <sub>16</sub> O <sub>3</sub> )                | 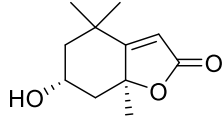<br>Calendin                                    |
| 13 | 400  | 26 | 238<br>(C <sub>14</sub> H <sub>10</sub> N <sub>2</sub> O <sub>2</sub> ) | <br>3-(2'-hydroxyphenyl)-4(3H)-quinazolinone    |
| 14 | >800 | 27 | 145<br>(C <sub>9</sub> H <sub>7</sub> NO)                               | <br>1H-indole-3-carboxaldehyde                  |
| 15 | 200  | 10 | 300<br>(C <sub>16</sub> H <sub>12</sub> O <sub>6</sub> )                | <br>hispidulin                                  |
| 16 | >800 | 7  | 165<br>(C <sub>8</sub> H <sub>7</sub> NO <sub>3</sub> )                 | <br>2-hydroxy-(2H)-1,4-benzoxazin-3(4H)-one    |
| 17 | >800 | 4  | 181<br>(C <sub>9</sub> H <sub>11</sub> NO <sub>3</sub> )                | <br>2-hydroxy-N-(2-hydroxyphenyl)propionamide |
| 18 | >800 | 19 | 274<br>(C <sub>16</sub> H <sub>18</sub> O <sub>4</sub> )                | <br>bungein A                                 |
| 19 | 200  | 2  | 136<br>(C <sub>8</sub> H <sub>8</sub> O <sub>2</sub> )                  | <br>p-hydroxyacetophenone                    |
| 20 | >800 | 8  | 186<br>(C <sub>11</sub> H <sub>10</sub> N <sub>2</sub> O)               | <br>deoxyvasicinone                           |
| 21 | >800 | 3  | 122<br>(C <sub>6</sub> H <sub>6</sub> N <sub>2</sub> O)                 | <br>Nicotinamide                              |

|    |      |    |                                                         |                                                                                                               |
|----|------|----|---------------------------------------------------------|---------------------------------------------------------------------------------------------------------------|
| 22 | >800 | 21 | 146<br>(C <sub>8</sub> H <sub>6</sub> N <sub>2</sub> O) | 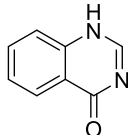<br>4(3H)-quinazolinone    |
| 23 | >800 | 5  | 281<br>(C <sub>18</sub> H <sub>35</sub> NO)             | <br>9(Z)-octadecene-1-amine |

#### References:

1. Jao C, Lin W, Wu Y, et al. Isolation, structure elucidation, and synthesis of cytotoxic tryptanthrin analogues from *Phaius mishmensis*[J]. *Journal of natural products*, 2008, 71(7): p. 1275–1279.
2. Barnes J P, Putnam A R, Burke B A, et al. Isolation and characterization of allelochemicals in rye herbage[J]. *Phytochemistry*, 1987, 26(5):1385-1390.
3. D'Abrosca B, Dellagrecia M, Fiorentino A, et al. Structure elucidation and phytotoxicity of C<sub>13</sub> nor-isoprenoids from *Cestrum parqui*[J]. *Phytochemistry*, 2004, 65(4): 497-505.
4. Abdolali A, Jvad M. Unexpected approach to the synthesis of 2-phenyl quinoxalines and pyrido[2,3-b]pyrazines via a regioselective reaction[J]. *Helvetica Chimica Acta*, 2013, 96(1): 124-129.
5. Koálová D, Hrochová V, Suchý V, et al. Two pyrrole acids from *Berberis koreana*[J]. *Phytochemistry*, 1992, 31(10): 3669-3670.
6. Katade SR, Pawar PV, Tungikar VB, et al. Larvicidal activity of bis (2-ethylhexyl) benzene-1,2-dicarboxylate from *Sterculia guttata* seeds against two mosquito species[J]. *Chemistry & Biodiversity*, 2006, 3(1): 49-53.
7. Zhang W, Lou H, Li G, et al. A new triterpenoid from *Entodon okamurai* broth[J]. *Journal of Asian Natural Products Research*, 2003, 5(3): 189-195.
8. Wu P, Hsu Y, Jao C. Indole alkaloids from *Cephalanceropsis gracilis*[J]. *Journal of Natural Products*, 2006, 69(10): 1467-1470.
9. DellaGreca M, Di Marino C, Zarrelli A, D'Abrosca B. Isolation and phytotoxicity of apocarotenoids from *Chenopodium album*[J]. *Journal of natural products*, 2004, 67(9):1492-1495.
10. Gutierrez-Lugo M, Woldemichael GM, Singh MP, et al. Isolation of three new naturally occurring compounds from the culture of *Micromonospora* sp. P1068[J]. *Natural Product Research*, 2005, 19(7): 645-652.
11. Duan H, Takaishi Y, Momota H, et al. Immunosuppressive constituents from *Saussurea medusa*[J]. *Phytochemistry*, 2002, 59(1): 85-90.
12. Jones L, Bartholomew B, Latif Z, et al. Constituents of *Cassia laevigata*[J]. *Fitoterapia*, 2000, 71(5): 580-583.
13. Liu YH, Qing GW, et al. Studies on chemical constituents in root of *Isatis indigotica*[J]. *Chinese Traditional and Herbal Drugs*, 2002, 33(2): 97-99.
14. Yang Q, Ye G. A new c-glucoside from *Commelina communis*[J], *Chemistry of Natural Compounds*, 2009, 45(1): 59-60.
15. Marques MR, Stüker C, Kichik N, et al. Flavonoids with prolyl oligopeptidase inhibitory activity isolated from *Scutellaria racemosa* Pers[J]. *Fitoterapia*, 2010, 81(6): 552-556.

16. Francisco AM, David M, Alberto O, et al. Isolation and synthesis of allelochemicals from gramineae: Benzoxazinones and related compounds[J]. Journal of Agricultural and Food Chemistry, 2006, 54(4): 991-1000.
17. Xie H, Liang Y, Xue J. Secondary metabolites of the phytopathogen *Peronophythora litchii*[J]. Natural Product Communications, 2010, 5(2): 245-248.
18. Yang H, Hou A, Mei S, et al. Constituents of *Clerodendrum bungei*[J]. Journal of Asian Natural Products Research, 2002, 4(3): 165-169.
19. Hacibekiroğlu, I. and Kolak, U. Antioxidant and anticholinesterase constituents from the petroleum ether and chloroform extracts of *Iris suaveolens*[J]. Phytotherapy Research, 2011, 25(4): 522-529.
20. Chen Y, Fan CL, Wang Y, et al. Chemical constituents from flowers of *Abelmoschus manihot*[J]. Zhongguo Zhong Yao Za Zhi. 2018, 43(10): 2091-2096
21. Yang SY, Li ZL, et al. Chemical constituents from roots of *Isatis indigotica*[J]. Chinese Traditional and Herbal Drugs. 2017, 48(14): 2827-2842
22. Liu Y, Ou YF, et al. Chemical constituents in the leaves of *Baphicacanthus cusia* (Nees) Bremek[J]. Chinese Journal of Medicinal Chemistry. 2009, 19(4): 273-275
23. Xie P, Zhang Y, Wang X, et al. Antithrombotic effect and mechanism of *Rubus* spp. Blackberry[J]. Food & function, 2017, 8(5): 2000-2012.
